# Supplementary figures and images for: Microcurrent-Mediated Modulation of Myofibroblasts for Cardiac Repair and Regeneration
Source: MDPI journal article supplement (doi:10.3390/ijms25063268), 2024-03-13

Supplementary Figure S1

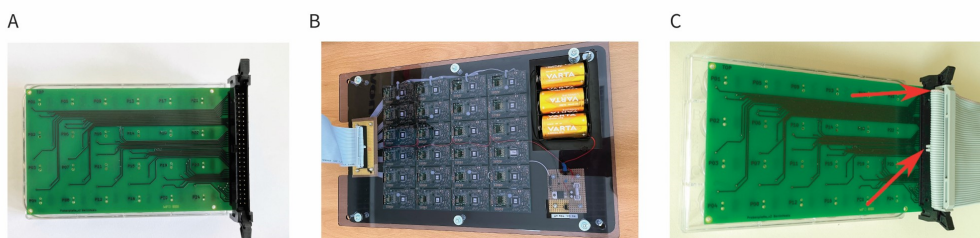

Supplement: s1 [file s1]
